# Supplementary material
Source: HighWire-hosted journal article supplement (https://ijgc.bmj.com/content/ijgc-2020-001241)
Supplement: inline-supplementary-material-1 [file inline-supplementary-material-1.pdf]

INTERNATIONAL JOURNAL OF  
**GYNECOLOGICAL CANCER**

**Clinical Patterns and Genomic Profiling  
of Recurrent Ultra-low Risk  
Endometrial Cancer**

**Co-authors:** Marina Stasenko, Noah Feit, Simon Lee, Cassandra Shepherd, Robert A. Soslow, Karen Cadoo, Kaled Alektiar, Edaise Da Silva, Ana Paula Martins Sebastião, Mario Leitao, Ginger Gardner, Pier Selenica, Nadeem Abu-Rustum, Britta Weigelt, Jennifer Mueller

“Ultra-low risk” endometrioid endometrial cancer recurrence rate is 2.9%

No identifiable clinical or pathologic risk factors noted.

Mutational profiling did not reveal differences between recurrent and nonrecurrent tumors.

Read the full article by searching the DOI: [10.1136/ijgc-2020-001338](https://doi.org/10.1136/ijgc-2020-001338)
